# Supplementary material for: Facile synthesis, crystal structure and bioactivity evaluation of two novel barium complexes based on 2,4,6-trichlorophenoxyacetic acid and o-ferrocenylcarbonyl benzoic acid
Source: Royal Society of Chemistry journal article supplement (doi:10.1039/c7nj03046k), 2017-01-01
Supplement: c7nj03046k1.pdf [file c7nj03046k1.pdf]

# A facile synthesis, crystal structure and bioactivity evaluation of two novel barium complexes based on 2,4,6-trichlorophenoxyacetic acid and *o*-ferrocenylcarbonyl benzoic acid

Xiuling Xu, Fan Hu and Qi Shuai\*

---

*Shaanxi Key Laboratory of Natural Products & Chemical Biology, College of Chemistry & Pharmacy, Northwest A&F University, Yangling, Shaanxi 712100, People's Republic of China.*

**Table S1.** Crystallographic data and refinement details for **1** and **2**

**Table S2.** Selected bond lengths (Å) and angles (°) for **1** and **2**

**Table S3.** Allelopathic Effects *Raphanus sativus* of ligand and complex **1** and **2**

**Fig. S1** UV-vis spectra of ligands and complexes.

**Fig. S2** <sup>1</sup>HNMR spectra of HTCPA.

**Fig. S3** <sup>1</sup>HNMR spectra of *o*-HOOC<sub>6</sub>H<sub>4</sub>-COFc.

**Fig. S4** IR spectra of complexes **1**.

**Fig. S5** IR spectra of complexes **2**.

**Fig. S6** The 1D chain of complex **1**.

**Fig. S7** The 2D layer of complex **1**.

**Fig. S8** The 3D network of complex **1**.

**Fig. S9** The 1D chain of complex **2**.

**Fig. S10** The 2D layer of complex **2**.

**Fig. S11** The 3D network of complex **2**.

**Fig. S12** The ORTEP-style diagram of complex **1**.

**Fig. S13** The ORTEP-style diagram of complex **2**.

**Table S1.** Crystallographic data and refinement details for **1** and **2**

| Complexes                                          | 1                                                                 | 2                                                                 |
|----------------------------------------------------|-------------------------------------------------------------------|-------------------------------------------------------------------|
| Empirical formula                                  | BaC <sub>16</sub> H <sub>16</sub> Cl <sub>6</sub> O <sub>10</sub> | BaC <sub>36</sub> H <sub>54</sub> Fe <sub>2</sub> O <sub>20</sub> |
| Formula weight                                     | 718.33                                                            | 1055.83                                                           |
| Temperature (K)                                    | 298(2)                                                            | 293(2) (2)                                                        |
| Crystal system                                     | Orthorhombic                                                      | Triclinic                                                         |
| space group                                        | <i>Pbcm</i>                                                       | <i>P-1</i>                                                        |
| <i>a</i> , Å                                       | 4.2229(6)                                                         | 9.3623(6)                                                         |
| <i>b</i> , Å                                       | 13.994(2)                                                         | 11.8133(15)                                                       |
| <i>c</i> , Å                                       | 42.276(6)                                                         | 20.503(2)                                                         |
| $\alpha$ (°)                                       | 90.00                                                             | 77.7340(10)                                                       |
| $\beta$ (°)                                        | 96.00                                                             | 89.018(2)                                                         |
| $\gamma$ (°)                                       | 90.00                                                             | 89.116(2)                                                         |
| Volume (Å <sup>3</sup> )                           | 2498.3(6)                                                         | 2215.3(4)                                                         |
| <i>Z</i>                                           | 4                                                                 | 2                                                                 |
| Calculated density (mg·m <sup>-3</sup> )           | 1.910                                                             | 1.583                                                             |
| Absorption coefficient (mm <sup>-1</sup> )         | 2.279                                                             | 1.600                                                             |
| <i>F</i> (000)                                     | 1400                                                              | 1076                                                              |
| Crystal size (mm)                                  | 0.30 x 0.30 x 0.30                                                | 0.40 x 0.39 x 0.15                                                |
| Index range                                        | -5<= <i>h</i> <=5<br>-17<= <i>k</i> <=18<br>-54<= <i>l</i> <=50   | -11<= <i>h</i> <=11<br>-13<= <i>k</i> <=14<br>-23<= <i>l</i> <=24 |
| Reflections collected / unique                     | 15055 / 2924                                                      | 7745 / 7745                                                       |
| <i>R</i> (int)                                     | 0.0489                                                            | 0.0000                                                            |
| Completeness (%)                                   | 99.9                                                              | 99.2                                                              |
| Data / restraints / parameters                     | 2924 / 0 / 154                                                    | 7745 / 0 / 533                                                    |
| Goodness-of-fit on <i>F</i> <sup>2</sup>           | 1.178                                                             | 1.039                                                             |
| Final <i>R</i> indices [ <i>I</i> >2σ( <i>I</i> )] | <i>R</i> <sub>1</sub> = 0.0589<br><i>wR</i> <sub>2</sub> = 0.1655 | <i>R</i> <sub>1</sub> = 0.1079<br><i>wR</i> <sub>2</sub> = 0.2672 |
| <i>R</i> indices (all data)                        | <i>R</i> <sub>1</sub> = 0.0652<br><i>wR</i> <sub>2</sub> = 0.1764 | <i>R</i> <sub>1</sub> = 0.1731<br><i>wR</i> <sub>2</sub> = 0.3393 |

Largest diff. peak and hole (eÅ<sup>-3</sup>)

2.066 and -4.902 1.536 and -1.339

<sup>3)</sup>

**Table S2.** Selected bond lengths (Å) and angles (°) for **1** and **2**

| <b>1</b>            |            |
|---------------------|------------|
| Ba(1)-O(3W)         | 2.718(7)   |
| Ba(1)-O(2W)         | 2.723(8)   |
| Ba(1)-O(3)          | 2.761(5)   |
| Ba(1)-O(3)A         | 2.761(5)   |
| Ba(1)-O(3W)B        | 2.792(7)   |
| Ba(1)-O(1W)B        | 2.876(6)   |
| Ba(1)-O(1W)C        | 2.876(6)   |
| Ba(1)-O(1W)A        | 2.953(6)   |
| Ba(1)-O(1W)         | 2.953(6)   |
| O(3W)-Ba(1)-O(2W)   | 127.5(2)   |
| O(3W)-Ba(1)-O(3)    | 74.61(17)  |
| O(2W)-Ba(1)-O(3)    | 120.18(13) |
| O(3W)-Ba(1)-O(3W)B  | 100.1(2)   |
| O(2W)-Ba(1)-O(3W)B  | 132.4(2)   |
| O(3)-Ba(1)-O(3W)B   | 67.85(15)  |
| O(3W)B-Ba(1)-O(1W)B | 70.21(16)  |
| O(3W)-Ba(1)-O(1W)A  | 70.03(15)  |
| O(1W)C-Ba(1)-O(1W)A | 92.84(16)  |
| O(3W)-Ba(1)-O(1W)   | 70.03(15)  |
| O(2W)-Ba(1)-O(1W)   | 68.31(18)  |
| O(3)-Ba(1)-O(1W)    | 73.11(17)  |
| O(1W)B-Ba(1)-O(1W)  | 92.84(16)  |
| <b>2</b>            |            |
| Ba(1)-O(11)         | 2.69(2)    |
| Ba(1)-O(14)         | 2.759(17)  |
| Ba(1)-O(8)          | 2.760(13)  |
| Ba(1)-O(12)         | 2.77(3)    |
| Ba(1)-O(13)         | 2.79(2)    |
| Ba(1)-O(9)          | 2.811(15)  |
| Ba(1)-O(10)         | 2.822(14)  |
| Ba(1)-O(7)          | 2.890(11)  |
| O(11)-Ba(1)-O(14)   | 75.7(6)    |
| O(11)-Ba(1)-O(8)    | 72.9(6)    |
| O(14)-Ba(1)-O(8)    | 134.3(6)   |
| O(11)-Ba(1)-O(12)   | 138.6(7)   |
| O(14)-Ba(1)-O(12)   | 134.2(7)   |
| O(8)-Ba(1)-O(12)    | 65.7(6)    |
| O(11)-Ba(1)-O(13)   | 139.6(8)   |
| O(14)-Ba(1)-O(13)   | 128.7(7)   |
| O(8)-Ba(1)-O(13)    | 96.4(7)    |
| O(12)-Ba(1)-O(13)   | 51.4(8)    |
| O(11)-Ba(1)-O(9)    | 67.7(7)    |
| O(14)-Ba(1)-O(9)    | 126.6(6)   |
| O(8)-Ba(1)-O(9)     | 68.6(4)    |
| O(12)-Ba(1)-O(9)    | 98.2(7)    |
| O(13)-Ba(1)-O(9)    | 72.1(6)    |
| O(11)-Ba(1)-O(10)   | 92.0(6)    |
| O(14)-Ba(1)-O(10)   | 67.9(5)    |

Symmetry transformations used to generate equivalent atoms:

<sup>1</sup>A x, y, -z+1/2, B x-1, y, z, C x-1, y, -z, D x+1, y, z; <sup>2</sup>A -x+2, -y+1, -z+1

**Table S3.** Allelopathic Effects Raphanus sativus of ligand and complex 1 and 2

| Compound                                         | Germination rate |      |      |      | Shoot elongation (RI) |       |       |       | Root elongation (RI) |       |       |       |
|--------------------------------------------------|------------------|------|------|------|-----------------------|-------|-------|-------|----------------------|-------|-------|-------|
|                                                  | 50               | 100  | 150  | 200  | 50                    | 100   | 150   | 200   | 50                   | 100   | 150   | 200   |
| HTCPA                                            | 0.61             | 0.89 | 0.50 | 0.45 | -0.51                 | -0.54 | -0.60 | -0.77 | -0.36                | -0.58 | -0.85 | -0.88 |
| <b>1</b>                                         | 0.55             | 0.72 | 0.78 | 0.72 | -0.46                 | -0.50 | -0.51 | -0.56 | -0.16                | -0.39 | -0.45 | -0.48 |
| <i>o</i> -HOOC <sub>6</sub> H <sub>4</sub> -COFc | 0.72             | 0.61 | 0.66 | 0.83 | -0.25                 | -0.31 | -0.33 | -0.52 | -0.46                | -0.51 | -0.63 | -0.67 |
| <b>2</b>                                         | 0.39             | 0.56 | 0.83 | 0.61 | -0.17                 | -0.29 | -0.31 | -0.33 | -0.35                | -0.51 | -0.53 | -0.57 |
| gp                                               | 0.56             | 0.78 | 0.72 | 0.67 | -0.34                 | -0.46 | -0.58 | -0.90 | -0.38                | -0.78 | -0.83 | -0.95 |
| ck                                               | 0.44             | 0.89 | 0.50 | 0.44 |                       |       |       |       |                      |       |       |       |

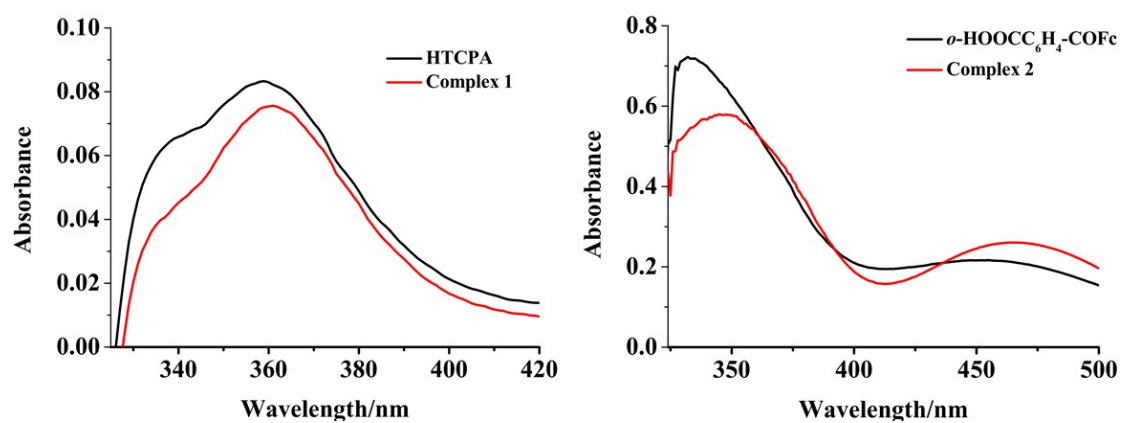

**Fig. S1** UV-vis spectra of ligands and complexes.

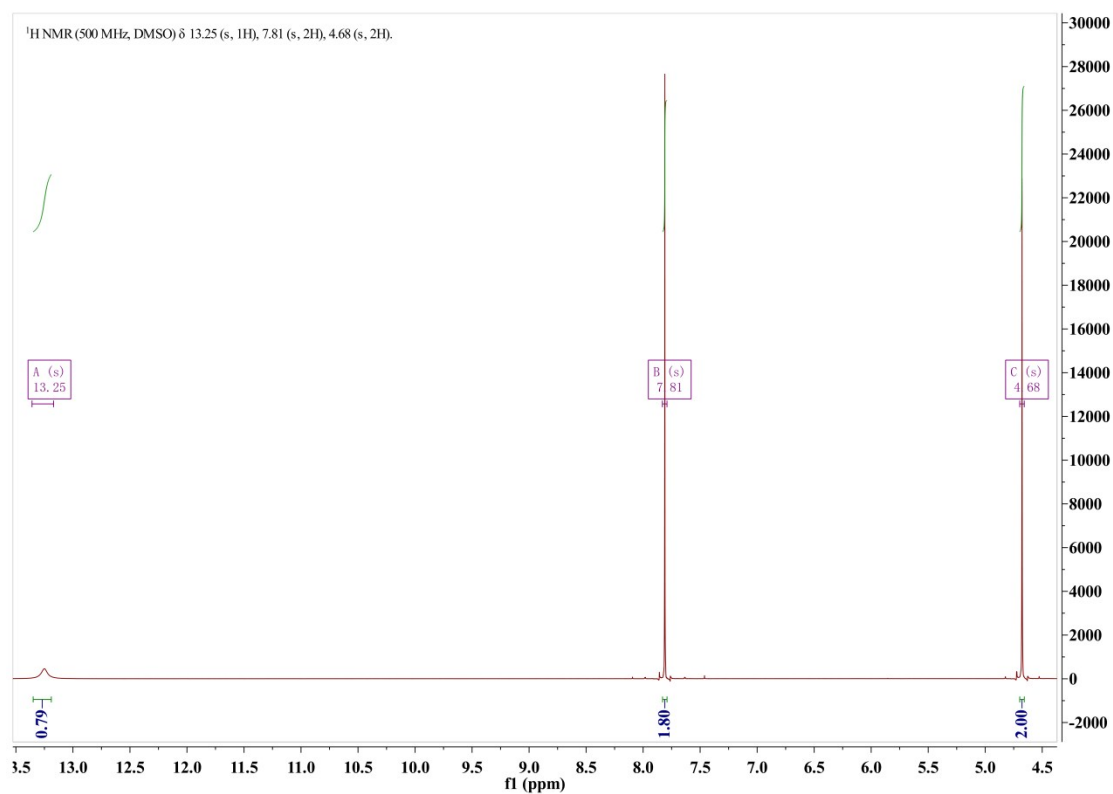

Fig. S2 <sup>1</sup>H NMR spectra of HTCPA.

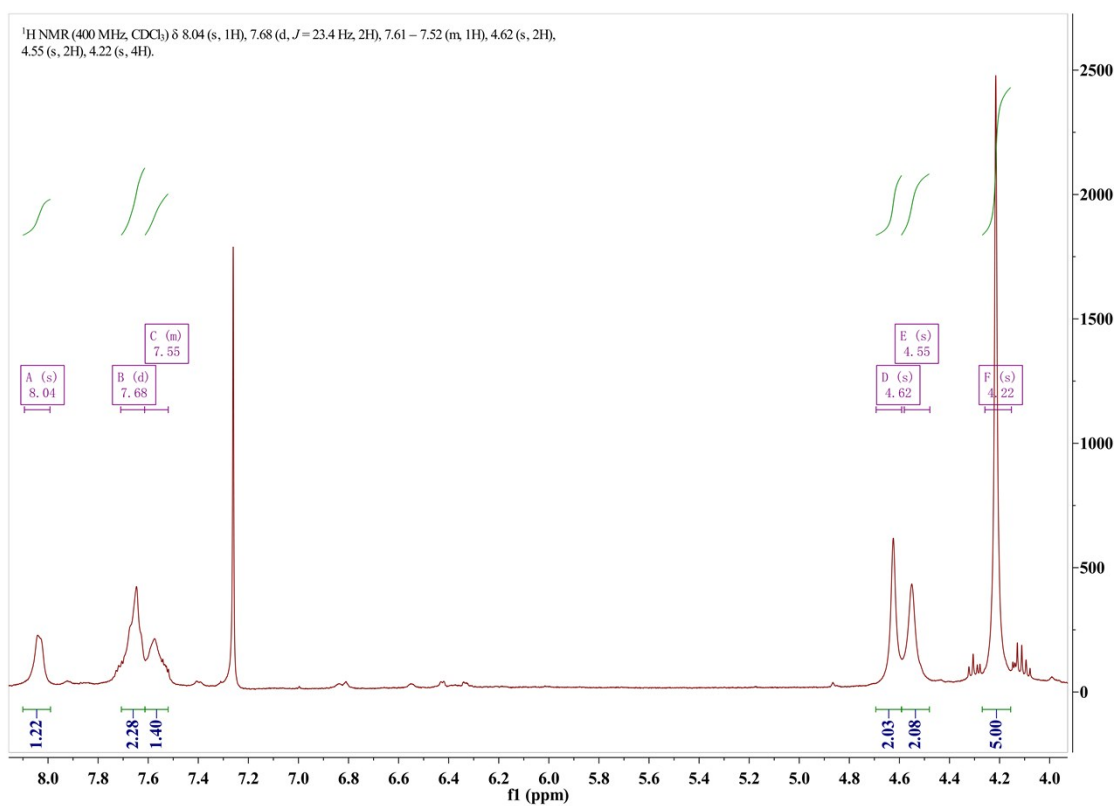

Fig. S3 <sup>1</sup>H NMR spectra of *o*-HOOC<sub>6</sub>H<sub>4</sub>-COFc.

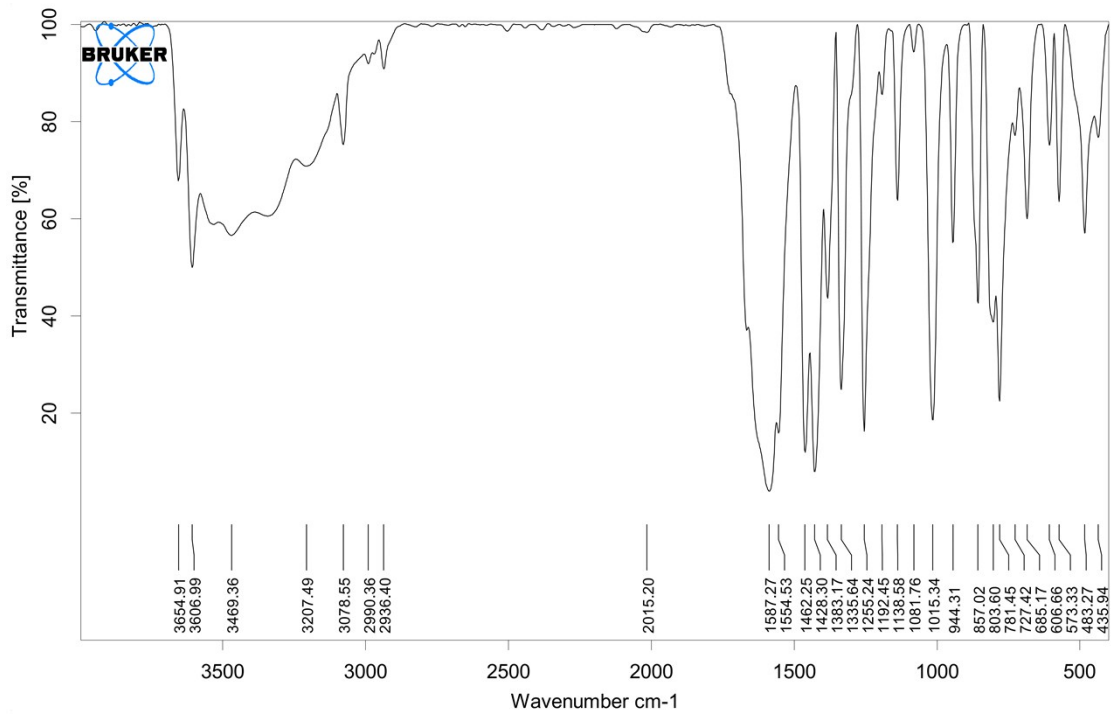

Fig. S4 IR spectra of complexes 1.

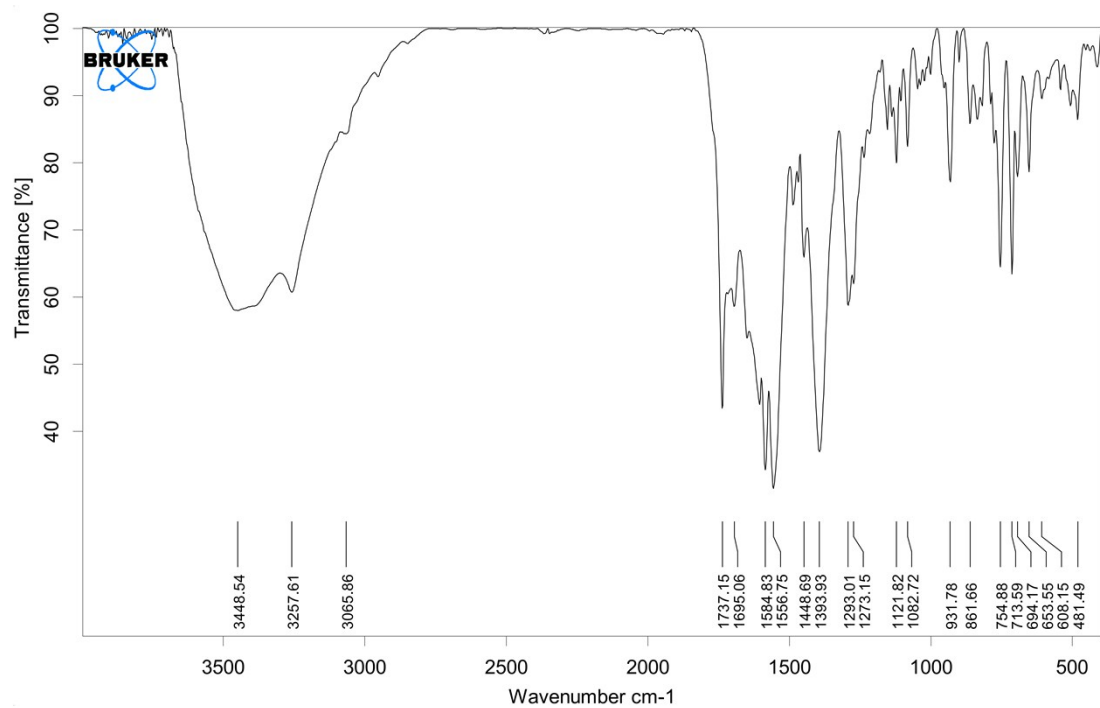

Fig. S5 IR spectra of complexes 2.

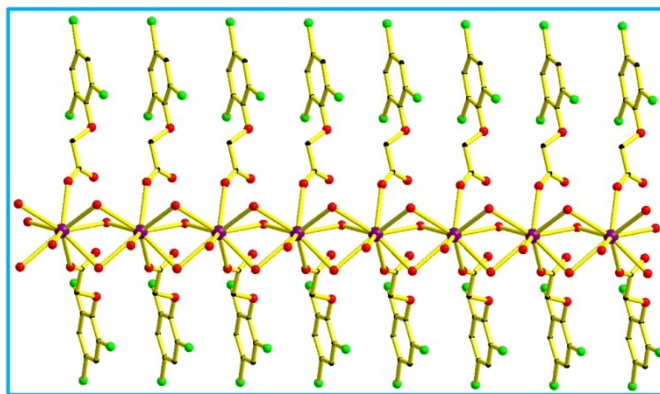

Fig. S6 The 1D chain of complex 1.

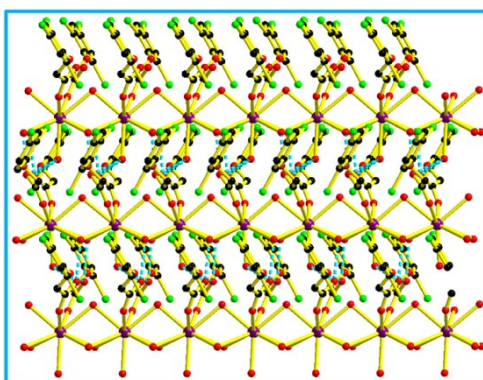

Fig. S7 The 2D layer of complex 1.

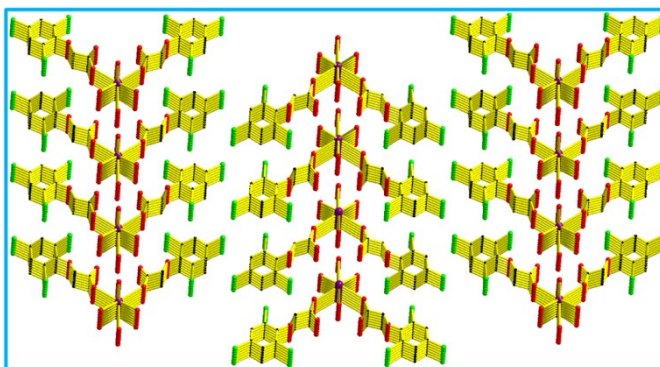

Fig. S8 The 3D network of complex 1.

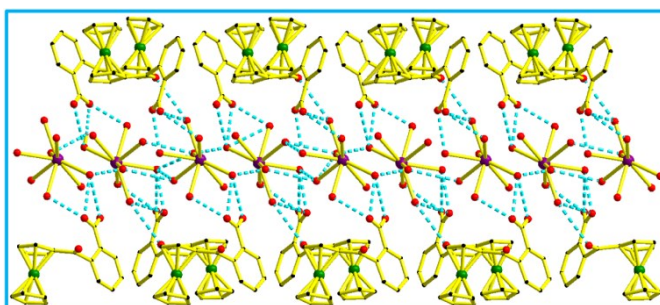

**Fig. S9** The 1D chain of complex 2.

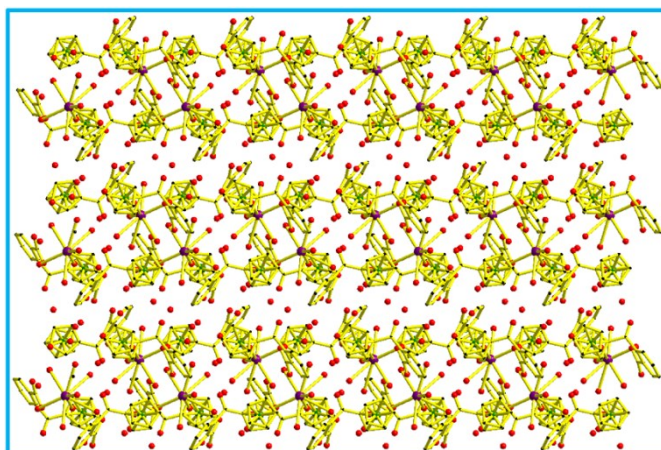

**Fig. S10** The 2D layer of complex 2.

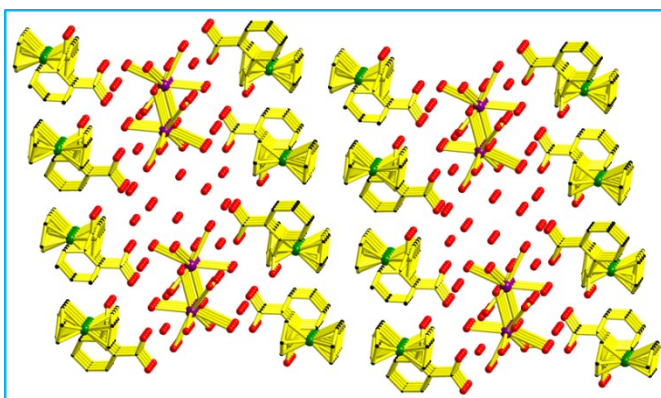

**Fig. S11** The 3D network of complex 2.



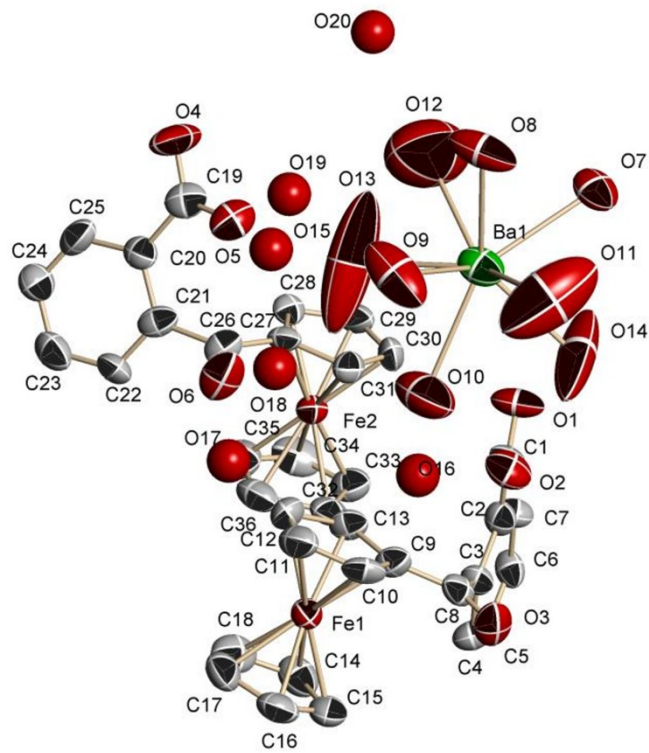

**Fig. S12** The ORTEP-style diagram of complex 1.

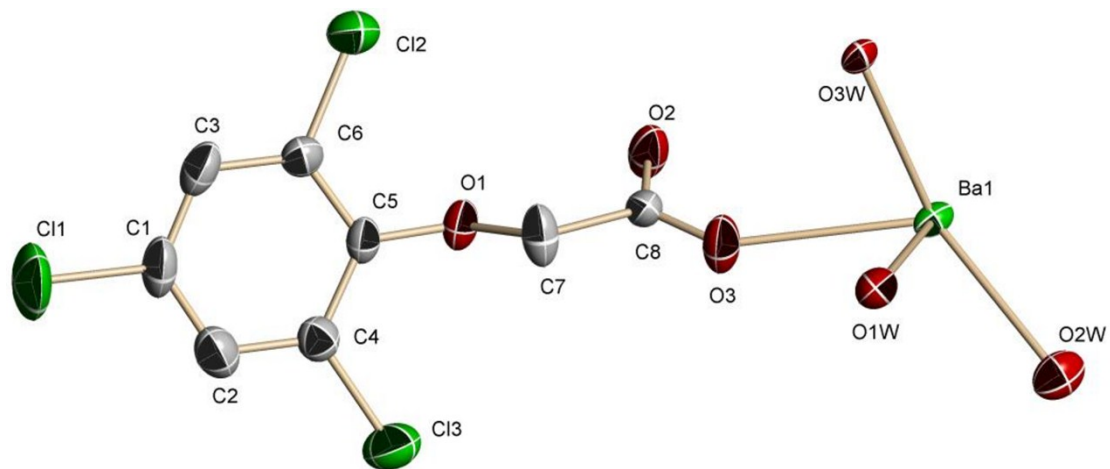

**Fig. S13** The ORTEP-style diagram of complex 2.
